# Supplementary material for: Carissa macrocarpa Leaves Polar Fraction Ameliorates Doxorubicin-Induced Neurotoxicity in Rats via Downregulating the Oxidative Stress and Inflammatory Markers
Source: MDPI journal article supplement (doi:10.3390/ph14121305), 2021-12-14
Supplement: s1 [file s1]

# ***Carissa macrocarpa* leaves polar fraction ameliorates doxorubicin-induced neurotoxicity in rats via downregulating the oxidative stress and inflammatory markers**

**Mohamed A. A. Orabi<sup>1</sup>, Heba M. A. Khalil<sup>2,\*</sup>, Mohamed E. Abouelela<sup>3</sup>, Dalia Zaafar<sup>4</sup>, Yasmine H. Ahmed<sup>5</sup>, Reham A. Naggar<sup>6</sup>, Hamad S. Alyami<sup>7</sup>, El-Shaymaa Abdel-Sattar<sup>8</sup>, Katsuyoshi Matsunami<sup>9</sup> and Dalia I. Hamdan<sup>10,\*\*</sup>**

1 Department of Pharmacognosy, College of Pharmacy, Najran University, Najran 55461, Kingdom of Saudi Arabia.

2 Department of Veterinary Hygiene and Management, Faculty of Veterinary Medicine, Cairo University, Giza, 12211, Egypt

3 Department of Pharmacognosy, Faculty of Pharmacy, Al-Azhar University, Assiut-branch, Assiut 71524, Egypt

4 Pharmacology and Toxicology Department, Faculty of Pharmacy, Modern University for Information and Technology

5 Cytology and Histology Department, Faculty of Veterinary Medicine, Cairo University, Giza, 12211, Egypt.

6 Department of pharmacology and Toxicology, college of pharmacy and Drug Manufacturing, Misr University of Science and Technology (MUST), 6th October, Giza 12566, Egypt

7 Department of Pharmaceutics, College of Pharmacy, Najran University, Najran 55461, Kingdom of Saudi Arabia

8 Department of Medical Microbiology and Immunology, Faculty of Pharmacy, South Valley University, 83523, Qena, Egypt

9 Department of Pharmacognosy, Graduate School of Biomedical and Health Sciences, Hiroshima University, 1-2-3 Kasumi, Minami-Ku, Hiroshima 734-8553, Japan

10 Department of Pharmacognosy and Natural Products, Faculty of Pharmacy, Menoufia University, Shibin Elkom, 32511, Egypt

\*Corresponding author:

**Heba M. A. Khalil,**

Department of Veterinary Hygiene and Management, Faculty of Veterinary Medicine, Cairo University, Giza, 12211, Egypt, Mobile: +201013666331. E-mail: heba.ali315@gmail.com.

\*\*Corresponding author:

**Dalia I. Hamdan,**

Department of Pharmacognosy and Natural Products, Faculty of Pharmacy, Menoufia University, Shibin Elkom, 32511, Egypt, Mobile: +201289699978. E-mail: masmn12345.1973@gmail.com.

## **Supplementary Material**

### **List of contents**

| <b>No</b>                                          | <b>Content</b>                                                                                             | <b>Page</b> |
|----------------------------------------------------|------------------------------------------------------------------------------------------------------------|-------------|
| <b>Figure S1</b>                                   | Structures of identified compounds and their isomers evaluated by molecular docking simulation             | S2          |
| <b>Figure S2</b>                                   | Continue structures of identified compounds and their isomers evaluated by molecular docking simulation    | S3          |
| <b>Figure S3</b>                                   | Continue structures of identified compounds and their isomers evaluated by molecular docking simulation.   | S4          |
| <b>Figure S4</b>                                   | TIC of <i>C. macrocarpa</i> polar fraction of the leaves using UPLC-ESI-MS/MS in negative ionization mode. | S4          |
| <b>Table S1</b>                                    | Docking score of detected polyphenolics and their isomers against TACE enzyme                              | S5          |
| <b>UPLC-ESI-MS-MS metabolites characterization</b> |                                                                                                            | S6-S8       |
| <b>References</b>                                  |                                                                                                            |             |

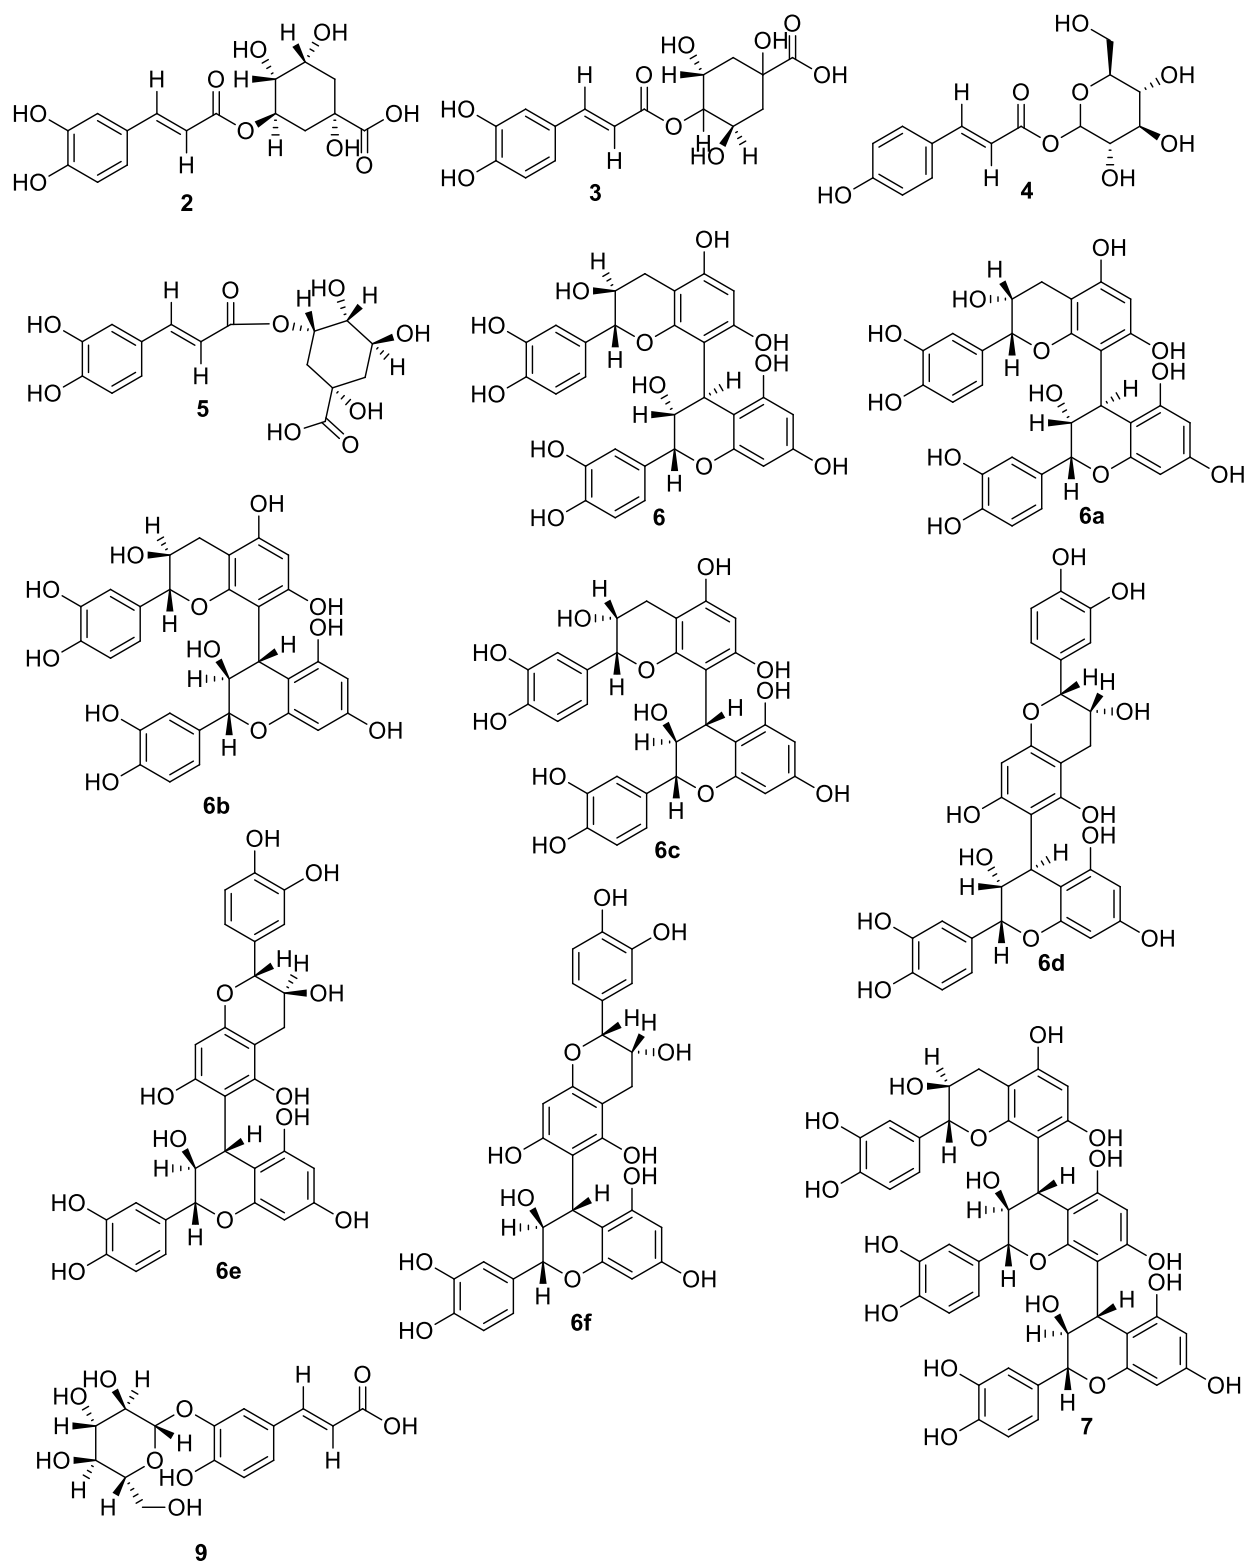

**Figure S1.** Structures of compounds evaluated by molecular docking simulation.

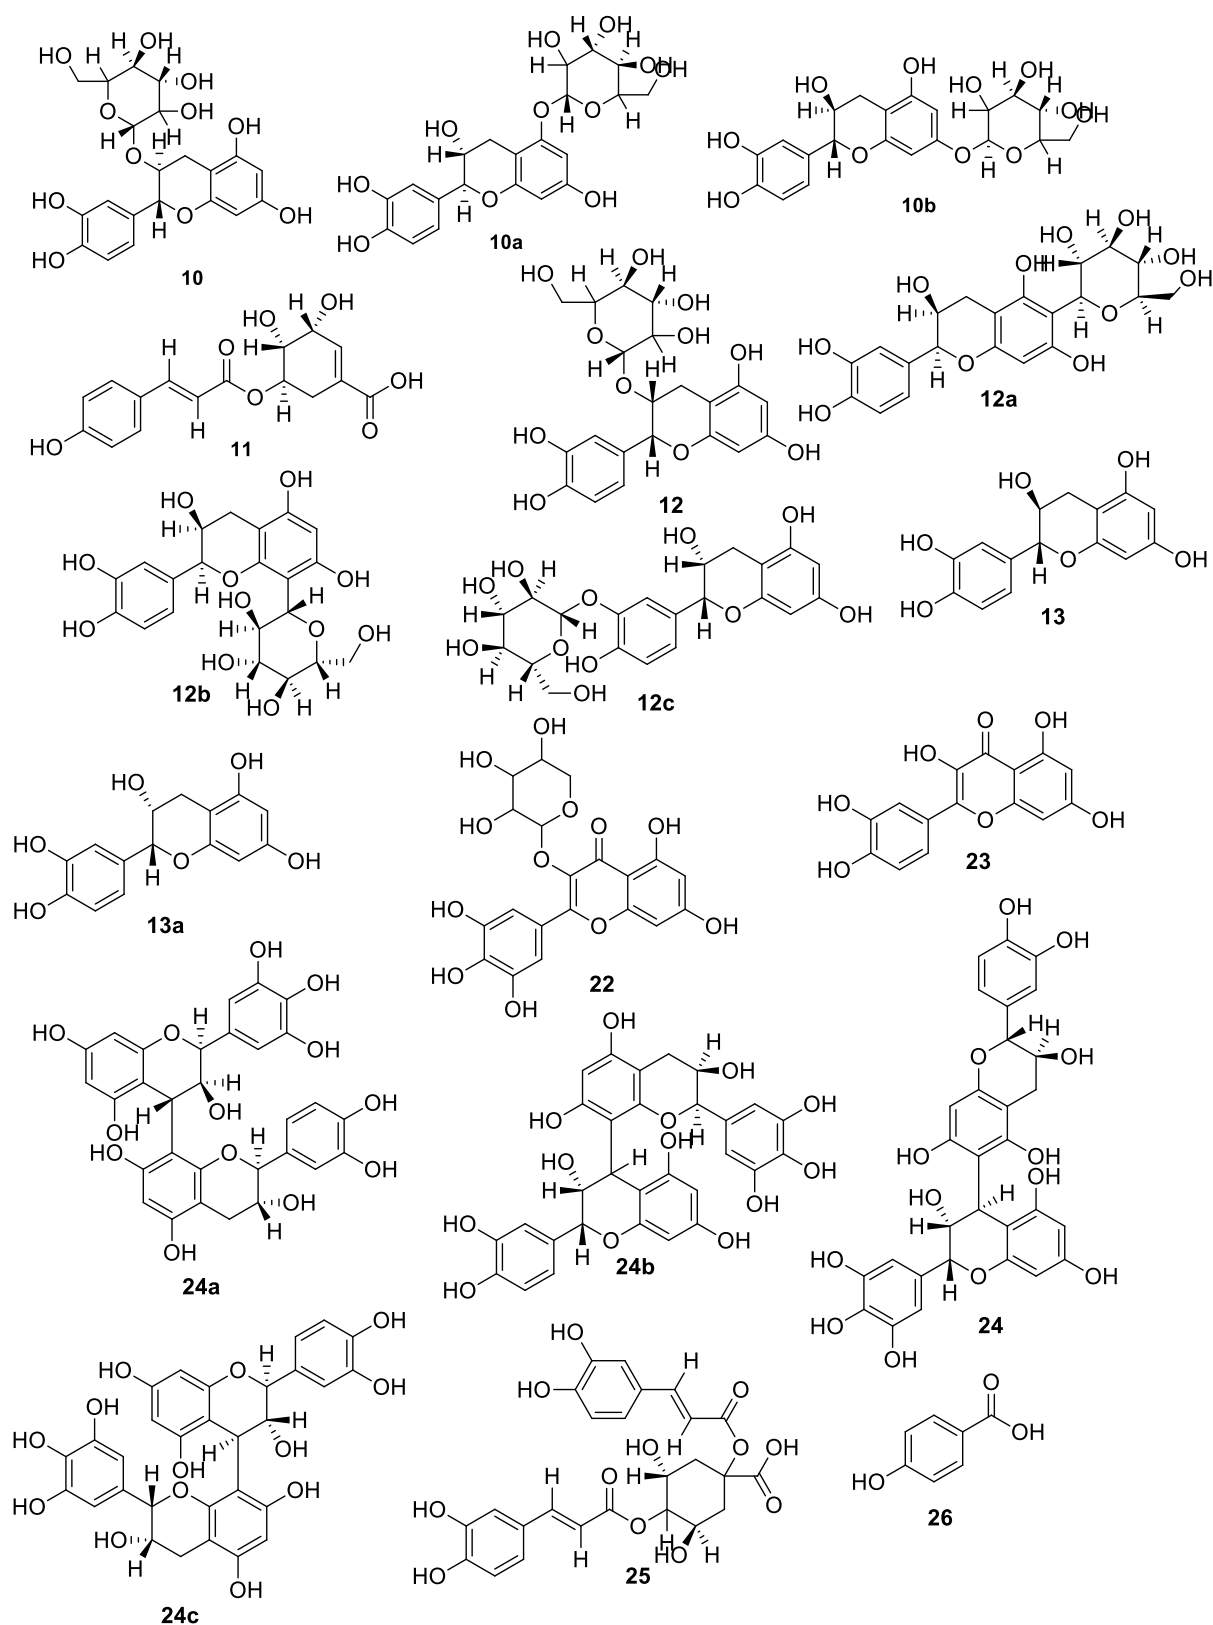

**Figure S2.** Structures of compounds evaluated by molecular docking simulation: Continued

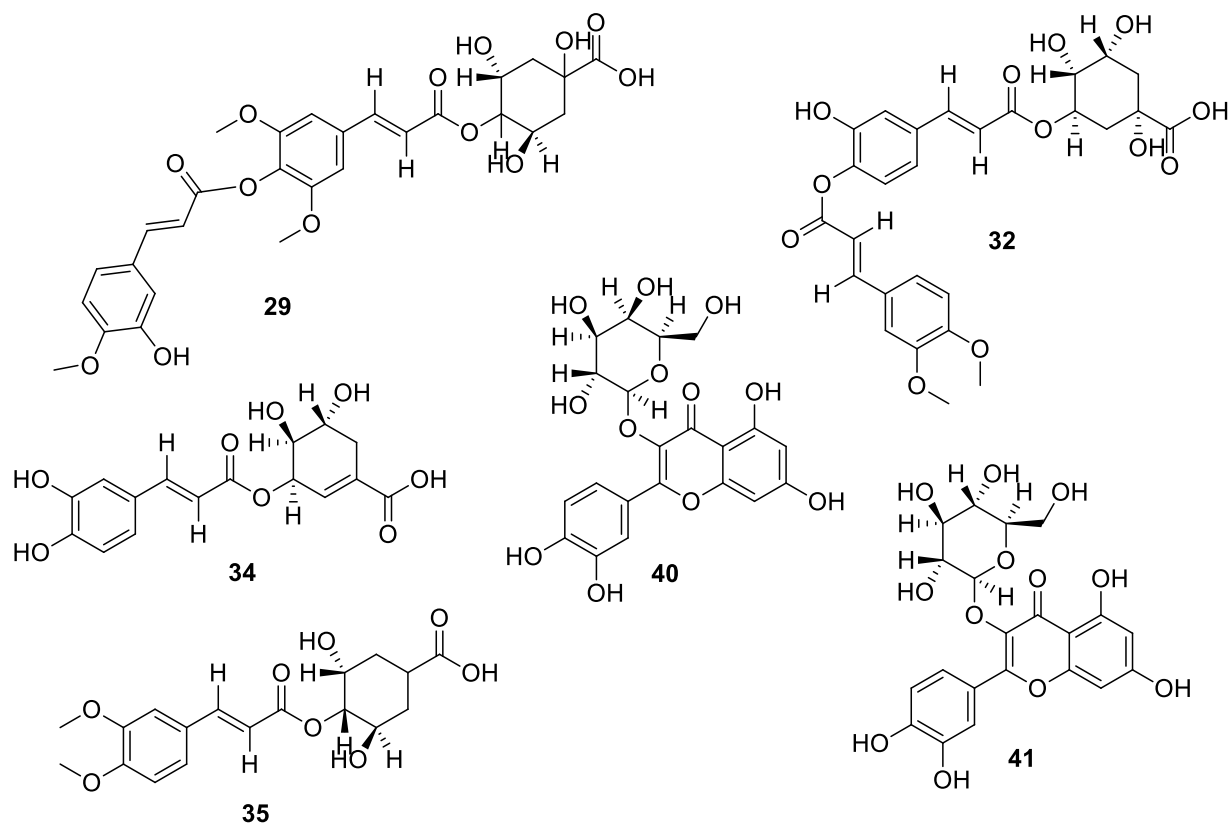

**Figure S3.** Structures of compounds evaluated by molecular docking simulation: Continued

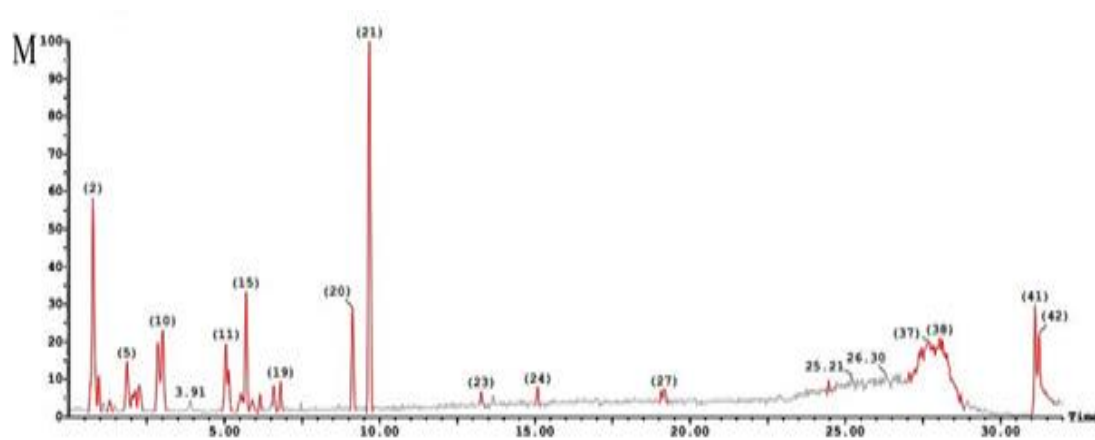

**Figure S4.** TIC of *C. macrocarpa* polar fraction of the leaves using UPLC-ESI-MS/MS in negative ionization mode.

**Table S1.** Docking score of detected polyphenolics and their isomers against TACE enzyme

| No.        | Compound Name                                        | TNF-activating converting enzyme (TACE) |                 |
|------------|------------------------------------------------------|-----------------------------------------|-----------------|
|            |                                                      | Score (kcal/mol)                        | RMSD refine (Å) |
| <b>2</b>   | Chlorogenic acid                                     | -12.6813                                | 0.91            |
| <b>3</b>   | Cryptochlorogenic acid                               | -13.3260                                | 0.93            |
| <b>4</b>   | coumaroyl-5- $\beta$ -glucose                        | -11.9755                                | 1.07            |
| <b>5</b>   | 5- <i>O</i> -Caffeoylquinic acid                     | -13.6537                                | 0.96            |
| <b>6</b>   | Procyanidin B1                                       | -16.2139                                | 2.66            |
| <b>6a</b>  | Procyanidin B2                                       | -17.5405                                | 1.82            |
| <b>6b</b>  | Procyanidin B3                                       | -13.9250                                | 1.60            |
| <b>6c</b>  | Procyanidin B4                                       | -17.5085                                | 0.84            |
| <b>6d</b>  | Procyanidin B5                                       | -19.9566                                | 1.77            |
| <b>6e</b>  | Procyanidin B6                                       | -21.9152                                | 1.25            |
| <b>6f</b>  | Procyanidin B8                                       | -17.0187                                | 1.92            |
| <b>7</b>   | Procyanidin C2                                       | -13.2742                                | 1.80            |
| <b>9</b>   | Caffeic acid 3-glucoside                             | -12.8895                                | 1.44            |
| <b>10</b>  | Catechin 3- <i>O</i> - $\beta$ -D-glucopyranoside    | -18.5367                                | 1.69            |
| <b>10a</b> | Catechin 5- <i>O</i> - $\beta$ -D-glucopyranoside    | -17.1693                                | 1.31            |
| <b>10b</b> | Catechin 7- <i>O</i> - $\beta$ -D-glucopyranoside    | -15.3866                                | 1.57            |
| <b>11</b>  | 4- <i>O</i> - <i>p</i> -Coumaroylshikimic acid       | -11.6970                                | 1.24            |
| <b>12</b>  | Epicatechin 3- <i>O</i> - $\beta$ -D-glucopyranoside | -20.6389                                | 1.34            |
| <b>12a</b> | Epicatechin 6-C-glucoside                            | -19.2057                                | 1.30            |
| <b>12b</b> | Epicatechin 8-C-glucoside                            | -19.1597                                | 0.93            |
| <b>12c</b> | Epicatechin-3'- <i>O</i> -glucoside                  | -14.7443                                | 1.74            |
| <b>13</b>  | Catechin                                             | -14.2871                                | 1.02            |
| <b>13b</b> | Epicatechin                                          | -14.1969                                | 0.84            |
| <b>22</b>  | Myricetin-3- <i>O</i> -xyloside                      | -18.2396                                | 1.15            |
| <b>23</b>  | Quercetin                                            | -13.1148                                | 1.19            |
| <b>24a</b> | Epigallocatechin-(4 $\beta$ -8)-catechin             | -18.0768                                | 1.27            |
| <b>24b</b> | Epicatechin (4 $\beta$ .8) epigallocatechin          | -18.3569                                | 1.97            |
| <b>24c</b> | Catechin-(4 $\alpha$ -8)-(-)-epigallocatechin        | -18.0083                                | 1.44            |
| <b>24</b>  | Epigallocatechin-(4 $\beta$ -6)-(+)-catechin         | -14.8778                                | 1.82            |
| <b>25</b>  | 1,4-Dicaffeoylquinic acid                            | -15.0462                                | 1.10            |
| <b>29</b>  | Feruloyl- <i>O</i> -sinapoylquinic acid              | -15.8150                                | 1.08            |
| <b>32</b>  | Dimethoxycinnamoyl- <i>O</i> -caffeoylquinic acid    | -13.6193                                | 1.00            |
| <b>34</b>  | 3-Caffeoylshikimic acid                              | -15.6133                                | 0.89            |
| <b>35</b>  | Dimethoxycinnamoylquinic acid                        | -13.1423                                | 1.48            |
| <b>40</b>  | Hyperoside                                           | -19.9102                                | 1.47            |
| <b>41</b>  | Isoquercetin                                         | -16.0728                                | 1.10            |

## UPLC-ESI-MS-MS metabolites characterization

### *Organic phenolic acids and their derivatives*

Hydroxybenzoic acid (**26**) and syringic acid (**28**) were detected at different retention times as reported in Table 1. Compounds **2**, **3**, **5**, and **34** that showed a molecular ion at  $m/z$  353 were detected at retention times 1.87, 2.03, 2.16, 15.06, and 16.52, respectively. Compounds **2** and **5** produced MS<sup>2</sup> fragments at  $m/z$  191 ([quinic acid-H]), 179 ([Caffeic acid-H]), 161 ([caffeic acid-H<sub>2</sub>O-H]), hence, assigned as 3-O-caffeolyquinic acid and 5-O-caffeolyquinic acid, respectively. Where 4-O-caffeolyquinic acid was designated for compound **3** with characteristic MS<sup>2</sup> fragments at  $m/z$  191, 173 [191-H<sub>2</sub>O], and 161 [1].

Additionally, 3-O-caffeoylshikimic acids has been proposed for **34**, depending upon MS<sup>2</sup> fragments (at  $m/z$  179, 161) and published data [2]. Another caffeolyquinic acid derivative, diacetoxy-5-methoxyphenyl) acroyl-O-*p*-coumaroyl-O-caffeoylquinic acid (**30**) was identified by the aid of MS, MS<sup>2</sup> data (Table 1), and reported literature [3].

Other hydroxycinnamate derivatives such as 5-O-*p*-coumaroylshikimic and 4-O-*p*-coumaroylshikimic acids have been suggested for peaks **8** and **11**. MS<sup>2</sup> fragmentation exhibited a base peak at  $m/z$  163 due to [*p*-coumaric acid-H<sub>2</sub>O], as well as other characteristic fragments [3]. Moreover, peak **25**, which was detected at retention time 6.58 showed deprotonated molecular ion at  $m/z$  515 and distinctive fragments at  $m/z$  353 [M-162] and 179 that are matched with the reported literature of dicaffeoylquinic acid (**25**). Feruloyl-O-sinapoylquinic acid (**29**) was designated for peak detected at  $m/z$  573 [M-H]<sup>-</sup>, based on MS<sup>2</sup> fragments (397 [M-ferulic acid-H], 223 [sinapic acid-H], 173 [quinic acid-H<sub>2</sub>O-H]) as compared with the literature [2]. Besides, compounds, dimethoxycinnamoyl-O-caffeoylquinic acid (**32**) and its isomer (**33**) were observed at different retention times 13.30 and 15.66 but exhibited similar deprotonated molecular ions at  $m/z$  543 and characteristic fragment ions at  $m/z$  353 [M-dimethoxycinnamoyl-H<sub>2</sub>O] and 173 that attributed to dimethoxycinnamoyl moiety. In addition, dimethoxycinnamoylquinic acid was suggested for peak **35** that was detected in positive ionization mode at  $m/z$  383 (R<sub>t</sub> 16.59) [2]. Moreover, hydroxycinnamate glycosides were detected in the current study at retention times 2.13 and 2.87, that are corresponding to peaks **4** and **9**, respectively. Where peaks **4** was suggested to be coumaric acid hexoside, due to molecular ions at  $m/z$  325 [M-H]<sup>-</sup> which produced fragment ions at  $m/z$  187, 163, and 145 in accordance with the literature [4]. Also, caffeic acid hexoside was assigned for peak **9** depending upon its molecular ion at  $m/z$  343 [M+H]<sup>+</sup> with distinctive fragments at 326, 311, and 285, which in agreement with the reported data [5].

### *Flavonoids aglycone and glycosides*

Flavonoids are considered one of the major polyphenolics detected in the polar fractions of the species under investigation. Peak **14** and **15** provided the same deprotonated molecular ion at  $m/z$  755 [M-H]<sup>-</sup> with different MS<sup>2</sup> fragments, which were 593 [M-162, sugar unit] and 285 [M-308, rutinoside unit] for peak **14** that assigned as kaempferol-O-hexoside-O-rutinoside. However, quercetin-O-deoxyhexoside-O-deoxyhexosyl-hexoside was proposed for peak **15** that produced fragment ions at  $m/z$  609 [M-146, deoxyhexosyl unit] and 301 [M-146-308]<sup>-</sup>, deoxyhexosyl and rutinoside units]. Other kaempferol derivatives were kaempferol-O-

deoxyhexoside-O-deoxyhexosyl-hexoside isomers, which were designated for peaks **17** and **18**, respectively. Both compounds provided the same molecular ions ( $m/z$  739  $[M-H]^-$ ) and MS<sup>2</sup> fragmentation patterns ( $m/z$  593 and 285). Moreover, peaks **19** and **20** were tentatively identified as quercetin-O-deoxyhexosyl-hexoside isomers based on their molecular ion at  $m/z$  609  $[M-H]^-$  and MS<sup>2</sup> fragment at  $m/z$  301 due to loss of rutinoside unit (−308 amu). Also, the other isomer exhibited fragment ion at  $m/z$  465 in positive ionization mode due to loss of deoxyhexosyl unit (−146 amu). All the previous results were confirmed upon comparison with the literature [1].

Additionally, compounds **40** and **41** belong to quercetin derivatives and have been identified as quercetin-3-O-galactoside, and quercetin-3-O-glucoside, respectively, as depicted from their MS, MS<sup>2</sup> data and comparison with literature [6]. Where, compounds **40** and **41** provided the same molecular ion at  $m/z$  465  $[M+H]^+$  and MS<sup>2</sup> fragments at  $m/z$  301, 300, 257, 255, 229, 179, and 151.

Furthermore, compound **22** is belonging to flavonoid glycoside [3] that was tentatively identified as myricetin pentoside [7] based on its molecular ions at  $m/z$  449  $[M-H]^-$ . Myricetin pentoside showed characteristic MS<sup>2</sup> fragment at 317  $[M-132]$ . Finally, flavonoid aglycone such as quercetin has been proposed for peaks **23**.

#### *Flavan-3-ol derivatives*

*C. macrocarpa* is considered a main source of flavan-3-ol bioactive metabolites. From these interesting molecules, compound **13** has been identified as (epi) catechin based on a molecular ion at  $m/z$  289  $[M-H]^-$ , MS<sup>2</sup> fragmentation ( $m/z$  245, 205, 203, 187, 179, and 161) and comparison with literature [8]. Furthermore, compounds **6**, **7**, **21**, and **31** belong to (epi)catechin derivatives of B-type; thus, (epi)catechin dimer was assigned for peaks **6**, **21**, and **31** based on deprotonated molecular ion at  $m/z$  577  $[M-H]^-$ , MS<sup>2</sup> fragmentation ( $m/z$  425, 289) and comparison with the literature [1]. However, peak **7** that showed pseudo-molecular ion at  $m/z$  865  $[M-H]^-$ , and fragmentation patterns at  $m/z$  451, 425, 407, and 289, were tentatively identified as (epi)catechin trimer [1].

Moreover, compounds **10**, **12**, and **16** provided the same deprotonated molecular ion at  $m/z$  451  $[M-H]^-$  and different MS<sup>2</sup> fragments at  $m/z$  408, 393, 351, 337, 301, 273, and 245 for compound **10** that suggested to be catechin 3-O-glucoside. However, epicatechin 3-O-glucoside and its isomer were designated for compounds **12** and **16** with MS<sup>2</sup> fragments at  $m/z$  391, 343, 301, 287, 273, and 247 [9].

Compounds **24** and **27** were detected at the same molecular ion at  $m/z$  593  $[M-H]^-$  and showed MS<sup>2</sup> fragments at  $m/z$  557, 467, 441, 425, 407, and 289, hence proposed to be (epi)gallocatechin-(epi)catechin [7].

#### *Sterols and triterpenes*

Stigmasterol (**39**) was detected methanol soluble fraction [10,11]. Furthermore, the current study detected several triterpenoid aglycones at different retention times, such as compounds **36**, **37**, and **38**. Where compounds **36**, **37**, and **38** provided the same molecular ion at  $m/z$  455  $[M-H]^-$ ,

MS<sup>2</sup> fragment ions ( $m/z$  439, 419, 411, 410, 407, and 397) and designated as ursolic acid, carissic acid, and oleanolic acid upon comparison with literatures [12–15].

### Miscellaneous

Lignans such as carinol ( $m/z$  377 [M–H]<sup>–</sup> and MS<sup>2</sup> at 333, 271, 257, 163, and 119) was assigned for compound **(1)** depending on a comparison of its data with that previously reported [13]. Compound **42** with  $m/z$  621 [M–H]<sup>–</sup> and distinctive fragment ion at 501 was assigned as 2(R)-26-([(2E)-3-(4-hydroxy-3-methoxyphenyl)-1-oxo-2-propen-1-yl]oxy)-2,3-dihydroxypropylester [16]. Finally, compound **43** that detected at retention time at 31.25 possessed molecular ion at  $m/z$  429 [M–H]<sup>–</sup> and 431 [M+H]<sup>+</sup> with characteristic MS<sup>2</sup> fragments at  $m/z$  205, 191, 177, 149, 121, hence assigned as  $\alpha$ -tocopherol [17].

### References

1. Souilem F, Dias MI, Barros L, Calhelha RC, Alves MJ, Harzallah-Skhiri F, et al. Amantagula fruit (*Carissa macrocarpa* (Eckl.) A. DC.): nutritional and phytochemical characterization. *Plant Foods Hum Nutr.* 2019;74(1):76–82.
2. Jaiswal R, Matei MF, Subedi P, Kuhnert N. Does roasted coffee contain chlorogenic acid lactones or/and cinnamoylshikimate esters? *Food Res Int.* 2014;61:214–27.
3. Ben Said R, Hamed AI, Mahalel UA, Al-Ayed AS, Kowalczyk M, Moldoch J, et al. Tentative characterization of polyphenolic compounds in the male flowers of *Phoenix dactylifera* by liquid chromatography coupled with mass spectrometry and DFT. *Int J Mol Sci.* 2017;18(3):512.
4. Alakolanga A, Siriwardane A, Kumar NS, Jayasinghe L, Jaiswal R, Kuhnert N. LC-MSn identification and characterization of the phenolic compounds from the fruits of *Flacourtia indica* (Burm. F.) Merr. and *Flacourtia inermis* Roxb. *Food Res Int.* 2014;62:388–96.
5. Pereira E, Pimenta AI, Calhelha RC, Antonio AL, Verde SC, Barros L, et al. Effects of gamma irradiation on cytotoxicity and phenolic compounds of *Thymus vulgaris* L. and *Mentha x piperita* L. *LWT-Food Sci Technol.* 2016;71:370–7.
6. Lin L-Z, Chen P, Harnly JM. New phenolic components and chromatographic profiles of green and fermented teas. *J Agric Food Chem.* 2008;56(17):8130–40.
7. Jaiswal R, Jayasinghe L, Kuhnert N. Identification and characterization of proanthocyanidins of 16 members of the *Rhododendron* genus (Ericaceae) by tandem LC–MS. *J Mass Spectrom.* 2012;47(4):502–15.
8. Kang J, Price WE, Ashton J, Tapsell LC, Johnson S. Identification and characterization of phenolic compounds in hydromethanolic extracts of sorghum wholegrains by LC-ESI-MSn. *Food Chem.* 2016;211:215–26.



9. Yuzuak S, Ballington J, Xie D-Y. HPLC-qTOF-MS/MS-based profiling of flavan-3-ols and dimeric proanthocyanidins in berries of two muscadine grape hybrids FLH 13-11 and FLH 17-66. *Metabolites*. 2018;8(4):57.
10. Petta V, Gkiozos I, Strimpakos A, Syrigos K. Histones and lung cancer: are the histone deacetylases a promising therapeutic target? *Cancer Chemother Pharmacol*. 2013;72(5):935–52.
11. Zhou Y-X, Xin H-L, Rahman K, Wang S-J, Peng C, Zhang H. *Portulaca oleracea* L.: a review of phytochemistry and pharmacological effects. *BioMed Res Int*. 2015;2015.
12. Moodley R, Chenia H, Jonnalagadda SB, Koorbanally N. Antibacterial and anti-adhesion activity of the pentacyclic triterpenoids isolated from the leaves and edible fruits of *Carissa macrocarpa*. *J Med Plants Res*. 2011;5(19):4851–8.
13. Patel S. Food, pharmaceutical and industrial potential of *Carissa* genus: an overview. *Rev Environ Sci Biotechnol*. 2013;12(3):201–8.
14. Kaunda JS, Zhang Y-J. The genus *Carissa*: An ethnopharmacological, phytochemical and pharmacological review. *Nat Prod Bioprospecting*. 2017;7(2):181–99.
15. Jiao Q-S, Xu L-L, Zhang J-Y, Wang Z-J, Jiang Y-Y, Liu B. Rapid characterization and identification of non-diterpenoid constituents in *Tinospora sinensis* by HPLC-LTQ-orbitrap MSn. *Molecules*. 2018;23(2):274.
16. Yu J-Q, Xian Y-X, Geng Y-L, Wang D-J, Zhou H-L, Wang X. Anti-liver cancer constituents from the thorns of *Gleditsia sinensis*. *Phytochem Lett*. 2015;13:343–7.
17. Izhar S, Ahmed D. *Carissa opaca*: A plant with great potential for future drugs for degenerative and infectious diseases. *ChemistrySelect*. 2016;1(12):3005–11.
